# Supplementary material for: Towards Interpretable LSTM-based Modelling of Hydrological Systems
Source: Copernicus journal article supplement (doi:10.5194/hess-2023-252), 2023-10-24
Supplement: Supplementary file 1 [file hess-2023-252-supplement.pdf]

# **Towards Interpretable LSTM-based Modelling of Hydrological Systems**

## **Supplementary information**

Luis A. De la Fuente<sup>1</sup>, Mohammad Reza Ehsani<sup>1</sup>, Hoshin V. Gupta<sup>1</sup>, and Laura E. Condon<sup>1</sup>

Department of Hydrology and Atmospheric Sciences, The University of Arizona, Tucson, 85721, United States

5 Supplementary information: Weight distribution for the 10 catchments at linear scale.

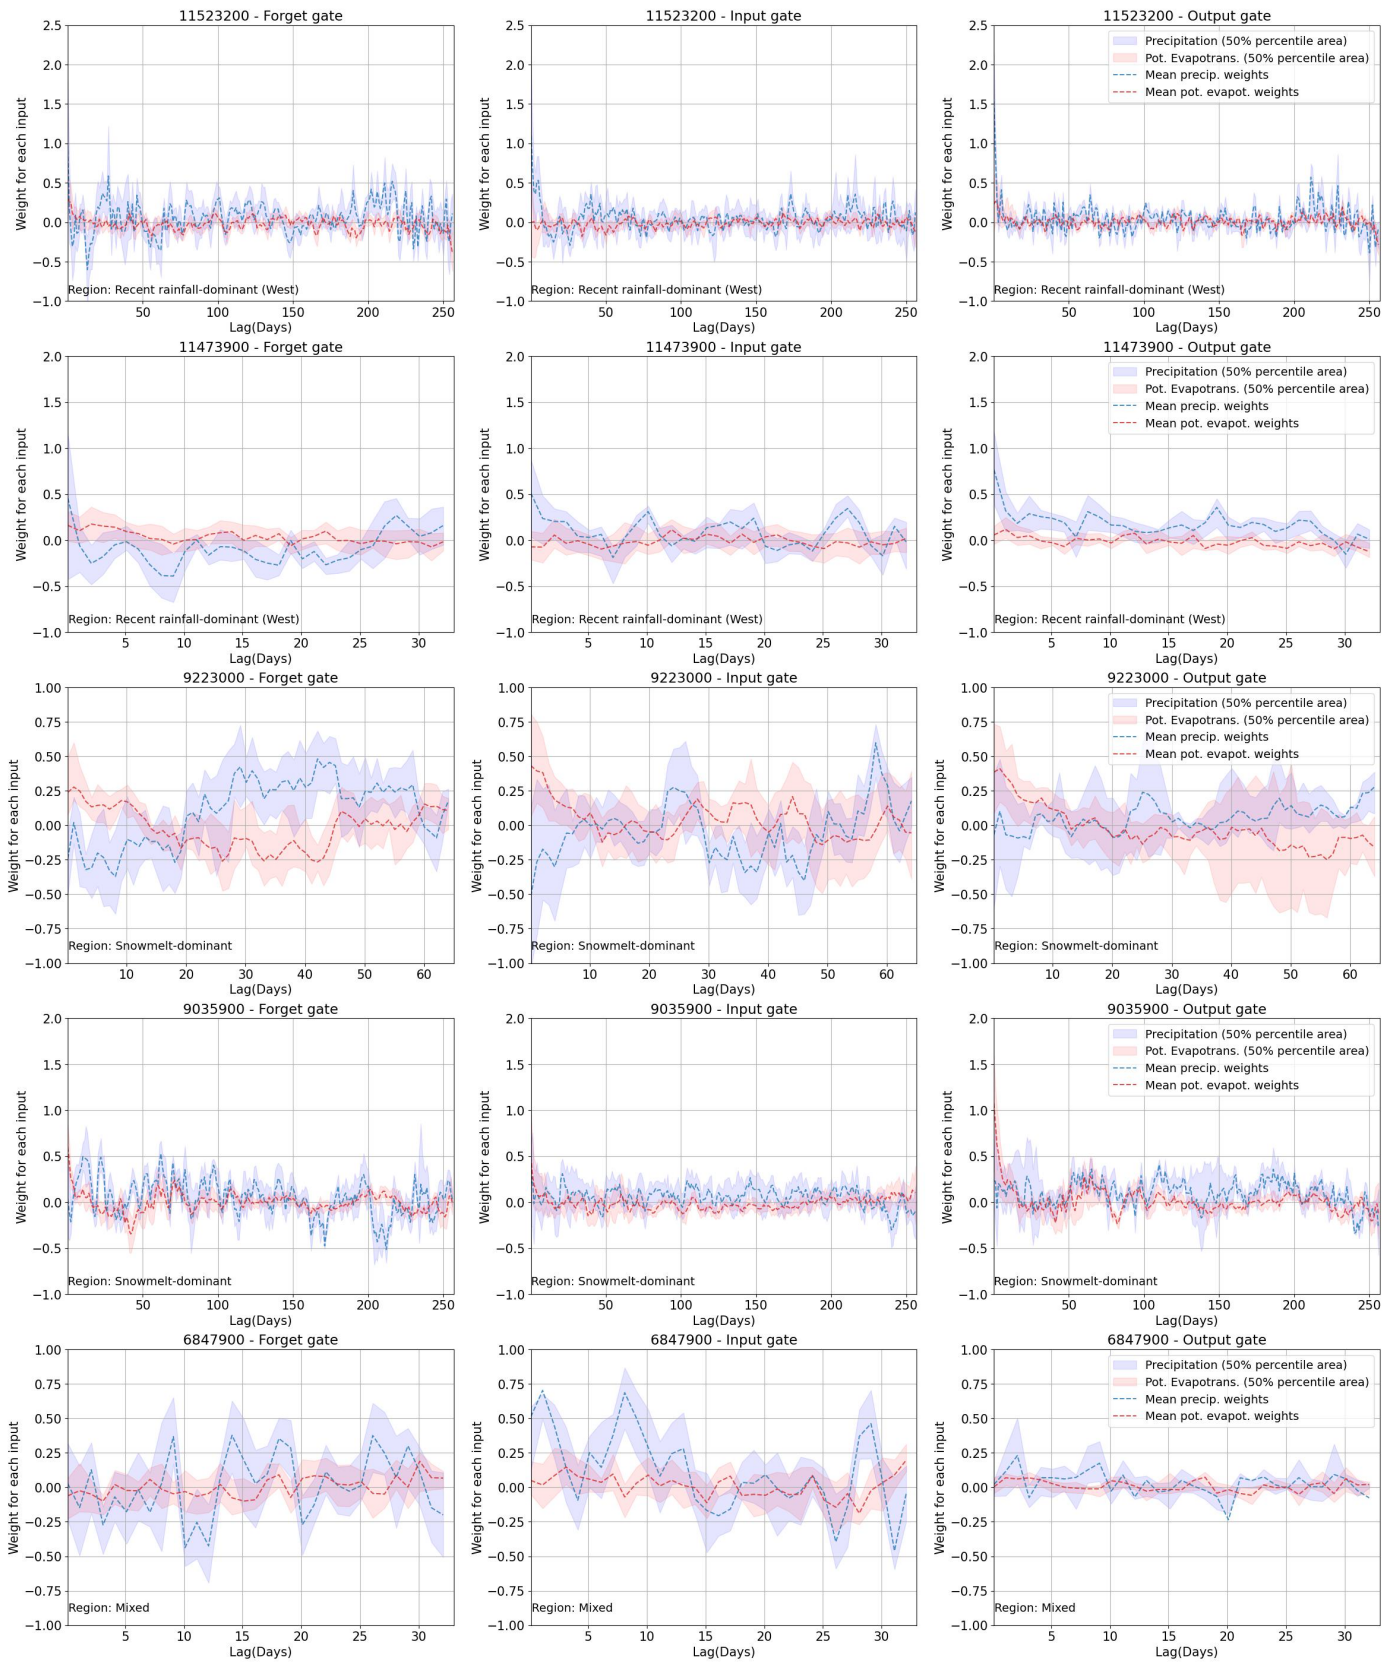

Figure S1a: Weight distribution in the three gates for HydroLSTM. Each row represents a different catchment. The confidence interval is the result of running 20 models with random initialization.

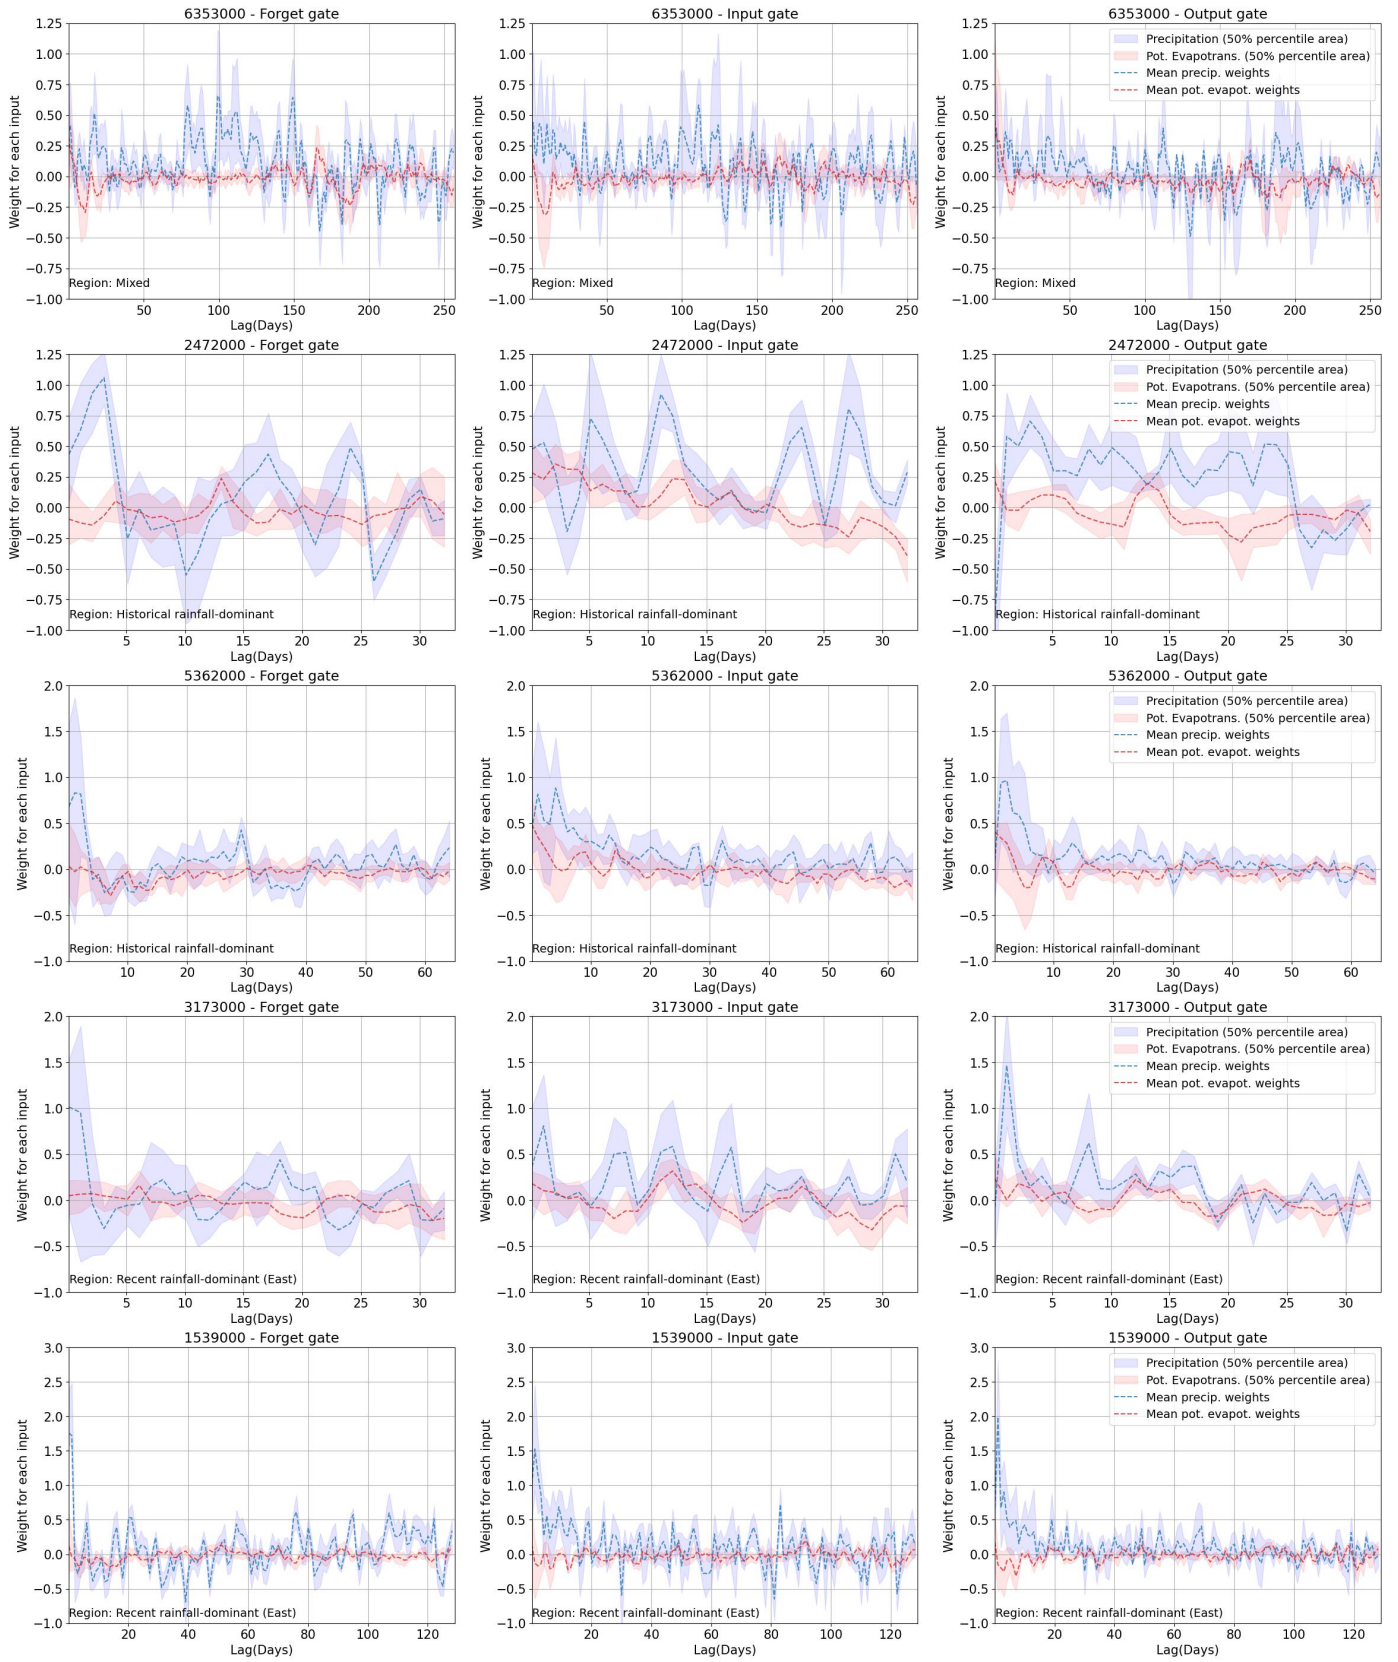

**Figure S1b: Weight distribution in the three gates for HydroLSTM. Each row represents a different catchment. The confidence interval is the result of running 20 models with random initialization.**
